# Supplementary material for: Anaerobic Co-Digestion to Enhance Waste Management Sustainability at Yosemite National Park
Source: MDPI journal article supplement (doi:10.3390/su141911877), 2022-09-21
Supplement: s1 [file s1]

Supplemental Materials

# Anaerobic Co-digestion to Enhance Waste Management Sustainability at Yosemite National Park

Julia Burmistrova <sup>1</sup>, Marc Beutel <sup>1,\*</sup>, Erin Hestir <sup>1</sup>, Rebecca Ryals <sup>1</sup>, Pramod Pandey <sup>2</sup>

<sup>1</sup> Environmental Systems Graduate Program, University of California, Merced, California 95343, USA

<sup>2</sup> Biological and Agricultural Engineering Department, University of California, Davis, California 95616, USA

**Table S1. Experimental design of biochemical methane potential incubations**

| Treatment        | Inoculum   |                    | Food Waste      |                    | Wastewater Solids |                    |
|------------------|------------|--------------------|-----------------|--------------------|-------------------|--------------------|
|                  | Volume, mL | Volatile Solids, g | Total Weight, g | Volatile Solids, g | Total Weight, g   | Volatile Solids, g |
| Inoculum control | 150        | 2.12               | 0.00            | 0.00               | 0.00              | 0.00               |
| 0% FW            | 102        | 1.44               | 0.00            | 0.00               | 48.47             | 1.41               |
| 10% FW           | 105        | 1.48               | 0.46            | 0.14               | 44.90             | 1.30               |
| 25% FW           | 110        | 1.56               | 1.20            | 0.37               | 39.18             | 1.14               |
| 50% FW           | 119        | 1.68               | 2.59            | 0.80               | 28.24             | 0.82               |
| 75% FW           | 130        | 1.84               | 4.24            | 1.31               | 15.41             | 0.45               |
| 90% FW           | 138        | 1.95               | 5.40            | 1.67               | 6.54              | 0.19               |
| 100% FW          | 143        | 2.00               | 6.22            | 1.93               | 0.00              | 0.00               |

Each incubation had a total volume of 150 ml and a ~1:1 ratio of VS in inoculum to VS in combined food waste (FW) and wastewater solids (WWS).

**Citation:** Burmistrova, J.; Beutel, M.; Hestir, E.; Ryals, R.; Pandey, P. Anaerobic Co-digestion to Enhance Waste Management Sustainability at Yosemite National Park. *Sustainability* **2022**, *14*, 11877. <https://doi.org/10.3390/su141911877>

Academic Editor: Luis Jesús Belmonte-Ureña

Received: 18 June 2022

Accepted: 18 September 2022

Published: 21 September 2022

**Publisher's Note:** MDPI stays neutral with regard to jurisdictional claims in published maps and institutional affiliations.

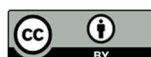

**Copyright:** © 2022 by the authors. Submitted for possible open access publication under the terms and conditions of the Creative Commons Attribution (CC BY) license (<https://creativecommons.org/licenses/by/4.0/>).

**Table S2. Summary of Park waste characterization and production.**

|                                            | Inoculum | Wastewater Solids | Food Waste |
|--------------------------------------------|----------|-------------------|------------|
| Waste Quality                              |          |                   |            |
| Density, g/mL                              | 1.01     | 1.01              | 1.10       |
| Total solids, g/g                          | 0.022    | 0.038             | 0.32       |
| Volatile solids, g/g                       | 0.014    | 0.029             | 0.31       |
| Waste Production at Yosemite National Park |          |                   |            |
| Total, kg/yr                               | NA       | 5,100,000         | 1,000,000  |
| Total solids, kg/yr                        | NA       | 194,000           | 320,000    |
| Volatile solids, kg/yr                     | NA       | 148,000           | 310,000    |

**Table S3. Summary of biochemical methane potential experimental results.**

| Treat-<br>ment | Initial<br>pH | Final<br>pH | Specific<br>Methane<br>Yield,<br>mL CH <sub>4</sub> /g VS | Volumetric<br>Methane<br>Yield,<br>mL CH <sub>4</sub> /mL | Biogas<br>Methane<br>Content,<br>% |
|----------------|---------------|-------------|-----------------------------------------------------------|-----------------------------------------------------------|------------------------------------|
| 0% FW          | 7.09          | 7.09        | 267 ± 16                                                  | 7.9 ± 0.4                                                 | 59.5 ± 1.1                         |
| 10% FW         | 7.04          | 7.12        | 302 ± 15                                                  | 9.5 ± 0.5                                                 | 62.8 ± 0.6                         |
| 25% FW         | 7.08          | 7.17        | 314 ± 24                                                  | 11.2 ± 1.0                                                | 63.3 ± 1.0                         |
| 50% FW         | 7.20          | 7.18        | 379 ± 24                                                  | 19.1 ± 1.4                                                | 64.7 ± 0.7                         |
| 75% FW         | 7.29          | 7.20        | 453 ± 37                                                  | 39.5 ± 3.0                                                | 66.5 ± 0.9                         |
| 90% FW         | 7.38          | 7.31        | 436 ± 54                                                  | 62.4 ± 7.7                                                | 68.5 ± 0.9                         |
| 100% FW        | 7.30          | 7.34        | 478 ± 38                                                  | 134.8 ± 10.8                                              | 67.5 ± 2.1                         |

Values are mean plus/minus estimated standard error of triplicate incubations. Standard error for pH were negligible and are not reported here. Methane yield metrics are based on cumulative values at the end of the 35-day incubation; methane content is average of last 15 days of experiment.

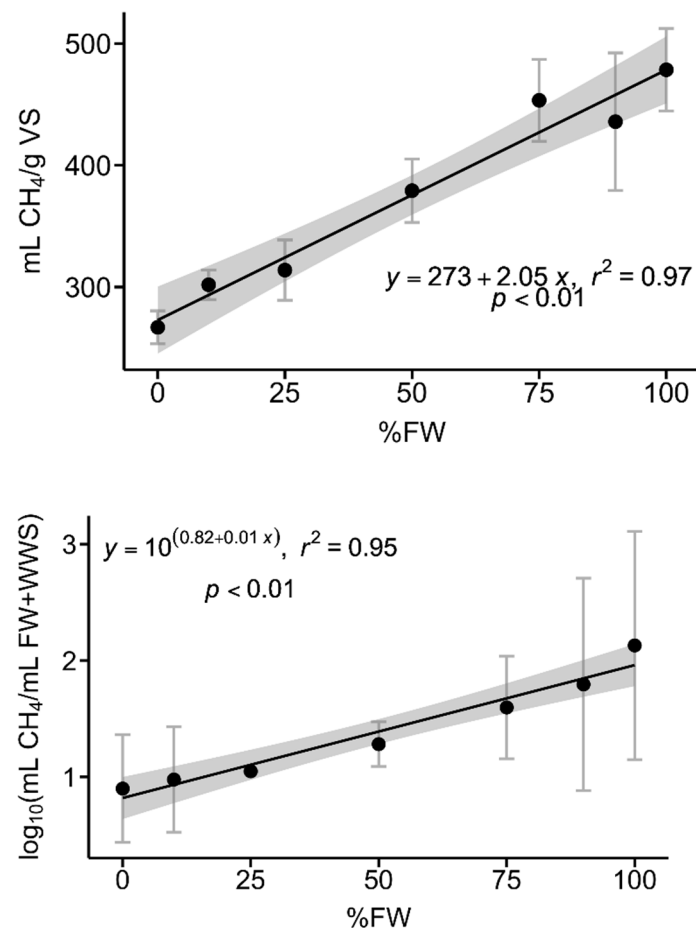

**Figure S1.** Top: Regression of cumulative specific methane yield with %FW; Bottom: Regression of cumulative volumetric methane yield with %FW. Error bars show one standard error of triplicate experimental treatments. Cloud shows 95% confidence interval.
