# Supplementary material for: Anaerobic Co-Digestion to Enhance Waste Management Sustainability at Yosemite National Park
Source: MDPI journal article supplement (doi:10.3390/su141911877), 2022-09-21
Supplement: s1 [file s1]

Archive with 1 entries (1 files):
- sustainability-1800572-supplementary.pdf
